# Supplementary material for: Measure transcript integrity using RNA-seq data
Source: PubMed Central journal article supplement (PMC4739097; doi:10.1186/s12859-016-0922-z), 2016-02-03

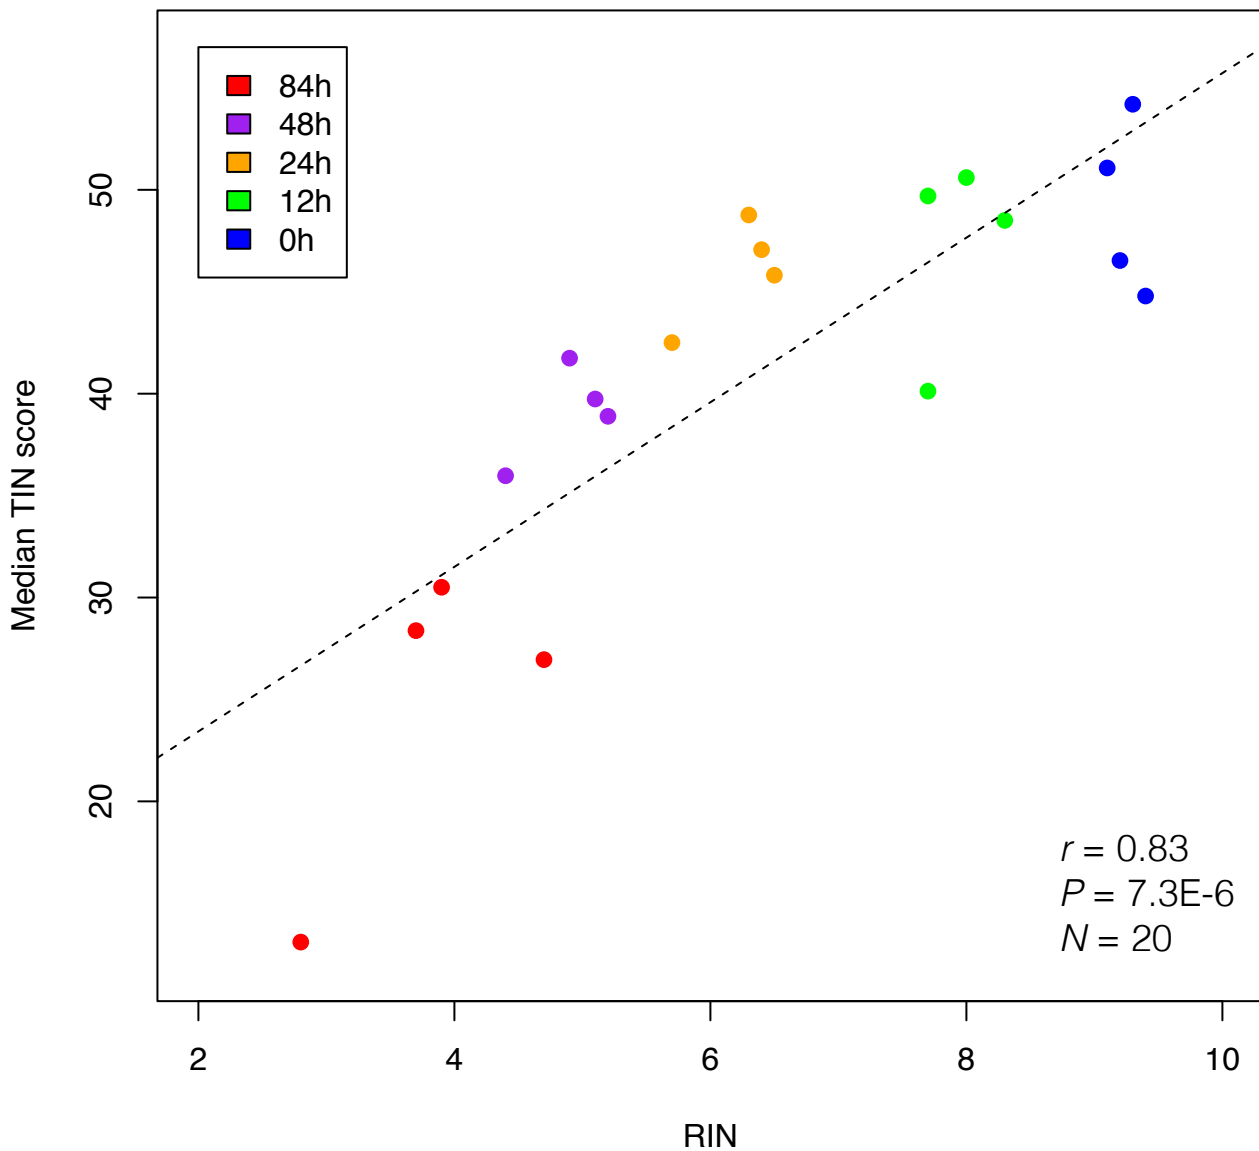

Supplement: 12859_2016_922_MOESM4_ESM.pdf [file 12859_2016_922_MOESM4_ESM.pdf]
